# Supplementary material
Source: PubMed Central journal article supplement (PMC9257583)
Supplement: jamainternmed-e221906-s001.pdf [file jamainternmed-e221906-s001.pdf]

## Supplemental Online Content

Fawzy A, Wu TD, Wang K, et al. Racial and ethnic discrepancy in pulse oximetry and delayed identification of treatment eligibility among patients with COVID-19. *JAMA Intern Med*. Published online May 31, 2022. doi:10.1001/jamainternmed.2022.1906

**eMethods 1.** Linear Mixed-Effects Model

**eMethods 2.** Sensitivity Analysis Methods

**eResults.** Sensitivity Analysis Results

**eTable 1.** Pre-defined race categories available in the Johns Hopkins Health System electronic medical record

**eTable 2.** Unadjusted linear mixed-effects model evaluating the association of race with SaO<sub>2</sub>-SpO<sub>2</sub> for the full cohort and limited to SpO<sub>2</sub> between 88% and 96%

**eTable 3.** Adjusted fully specified linear mixed-effects model including interactions between race and each covariate as fixed effects

**eFigure 1.** Average relative marginal effects by race from the adjusted fully specified linear mixed-effects model

**eTable 4.** Adjusted parsimonious linear mixed-effects model including significant interactions of race with SpO<sub>2</sub> and oxygen device as fixed effects

**eFigure 2.** Average absolute differences between SaO<sub>2</sub> and SpO<sub>2</sub> by race stratified by oxygen device

**eTable 5.** Baseline characteristics of patients testing positive for COVID-19 with predicted SaO<sub>2</sub> ≤ 94% before SpO<sub>2</sub> ≤ 94% or oxygen initiation included in the treatment eligibility delay analysis

**eFigure 3.** Proportion of patients with pulse oximetry (SpO<sub>2</sub>) ≤ 94% or initiated oxygen since predicted arterial oxygen saturation (SaO<sub>2</sub>) ≤ 94% among patients diagnosed with COVID-19 among patients ultimately having SpO<sub>2</sub> ≤ 94% or initiated oxygen

**eTable 6.** Absolute and relative treatment eligibility delay by race among 1,452 patients with predicted SaO<sub>2</sub> ≤ 94% before SpO<sub>2</sub> ≤ 94% or oxygen initiation

This supplemental material has been provided by the authors to give readers additional information about their work.

## **eMethods 1: Linear Mixed-Effects Model**

The association between race/ethnic category and the difference in paired SpO<sub>2</sub> and SaO<sub>2</sub> measurements (response variable) was examined using an unadjusted linear mixed-effects model with race/ethnicity included in the fixed effect and a random intercept. This was investigated in the overall sample and a sub-sample limited to patients with SpO<sub>2</sub> 88-96%. Given there were four race/ethnic categories, three comparisons were made (with White as the reference) and statistical significance was defined as  $p < 0.017$  based on Bonferroni correction. The linear mixed-effects model was then adjusted for age, sex, history of diabetes, Charleston Comorbidity Index (score of 1-4 vs. 5+), time-varying vital signs (mean arterial pressure and temperature) and laboratory results (creatinine, hemoglobin, and total bilirubin), and the time-varying oxygen device used by patients (room air or oxygen by mask or nasal prongs vs. high-flow nasal cannula or non-invasive vs. mechanical ventilation). These covariates were chosen based on their known or theoretical impact on pulse oximetry accuracy or association with COVID-19 clinical trajectory. Paired SpO<sub>2</sub>-SaO<sub>2</sub> measurements were mapped to the nearest mean arterial pressure and temperature measurements collected 4 hours before or 2 hours after, and to the nearest laboratory results in the preceding 48 hours. Only paired measurements with complete data for covariates were included in the analysis. All covariates and their interactions with race/ethnicity were included as fixed effects, and only those interactions with  $p$ -value  $< 0.05$  were retained in the final model. An intercept, time-varying vitals and lab measurements were included as random effects at the individual level to account for within-subject variation and dependency of repeated measurements. An unstructured variance-covariance structure was employed for each random effect and separate random effects were considered to be independent.

## **eMethods 2:** Sensitivity Analysis Methods

A sensitivity analysis was conducted excluding observations where titration of supplemental oxygen may have occurred between the measurement times of SpO<sub>2</sub> and SaO<sub>2</sub>. Specifically, we excluded observations where there was a mismatch in oxygen device, liters per minute, or fraction of inspired oxygen (FiO<sub>2</sub>). The majority of exclusions were due to missing or incomplete data. The linear mixed-effects models were re-fitted with the new sample. The analysis of unrecognized or delayed treatment eligibility was repeated using the alternative adjusted linear mixed-effects model.

## eResults 1: Sensitivity Analysis Results

The sensitivity analysis excluding observations where titration of oxygen may have occurred between SpO<sub>2</sub> and SaO<sub>2</sub> measurements included 1,030 patients with 29,198 concurrent SaO<sub>2</sub> and SpO<sub>2</sub> measurements for unadjusted linear mixed-effects model, and 976 patients with 26,857 concurrent SaO<sub>2</sub> and SpO<sub>2</sub> measurements and complete covariates used to fit the adjusted linear mixed-effects model. In unadjusted analysis, compared with White patients SpO<sub>2</sub> overestimated SaO<sub>2</sub> by 1.2% for Black patients, 0.5% for non-Black Hispanic patients and 1.5% for Asian patients ( $p < 0.017$  for all). Occult hypoxemia (SaO<sub>2</sub> < 88% with concurrent SpO<sub>2</sub> measurement 92-96%) was identified in 3.6% of Black patient samples, 2.8% of non-Black Hispanic patient samples, 3.6% of Asian patient samples, and 1.7% of White patient samples. At the patient level, 30.7% of Black patients, 31.8% of non-Black Hispanic patients, 30.4% of Asian patients, and 20.0% of White patients had occult hypoxemia at some point during the hospital encounter. In the adjusted linear mixed-effects model, compared with White patients, SpO<sub>2</sub> overestimated SaO<sub>2</sub> by an average of 1.1% among Black patients (95% confidence interval [CI]: 0.5% to 1.7%;  $p = 0.0002$ ), 1.0% among non-Black Hispanic patients (95% CI: 0.3% to 1.8%;  $p = 0.007$ ), and 1.9% among Asian patients (95% CI: 0.7% to 3.0%;  $p = 0.002$ ).

There were 1934 patients with predicted SaO<sub>2</sub> ≤ 94% before measured SpO<sub>2</sub> ≤ 94% or oxygen initiation. Compared to White patients, Black patients had a 28% lower hazard of eligibility recognition (hazard ratio [HR] 0.72; 95% CI 0.64-0.81;  $p < 0.0001$ ) and non-Black Hispanic patients had a 24% lower hazard of eligibility recognition (HR 0.76; 95% CI 0.66-0.81;  $p = 0.0002$ ) with no difference between White and Asian patients (HR 1.00; 95% CI 0.76-1.31;  $p = 0.98$ ). There were 455 patients with unrecognized treatment indication and their distribution by race was similar to the main analysis (50.5% Black, 29.2% non-Black Hispanic, 17.3% White, and 3% Asian). The median (IQR) treatment delay was attenuated for Asian patients but similar to the main analysis for other race/ethnicities: 6.9 (2.0-20.9) hours for Black patients, 5.0 (1.1-15.0) for non-Black Hispanic patients, 5.6 (1.4-14.9) for White patients, and 5.0 (1.7-13.0) for Asian patients. Similar to the main analysis, compared with White patients, Black patients were the only group that had a significantly higher median difference in time to recognition of eligibility by 1.0 hour (95% CI: 0.22 to 1.9 hours;  $p = 0.007$ ).

**eTable 1:** Pre-defined race categories available in the Johns Hopkins Health System electronic medical record.

|                                           |
|-------------------------------------------|
| White or Caucasian                        |
| Black or African American                 |
| American Indian or Alaska Native          |
| Asian                                     |
| Native Hawaiian or Other Pacific Islander |
| Other                                     |
| Patient Refused                           |
| Unknown                                   |
| Two or More Races                         |
| Declined to Answer                        |
| Hispanic                                  |
| Native Hawaiian                           |
| Other Pacific Islander                    |

**eTable 2:** Unadjusted linear mixed-effects model evaluating the association of race with SaO<sub>2</sub>-SpO<sub>2</sub> for the full cohort and limited to SpO<sub>2</sub> between 88% and 96%

|          | Full dataset<br>(N=1,216; 32,282 paired observations) |                        |                         | Limited to SpO <sub>2</sub> 88-96%<br>(N=950; 15,984 paired observations) |                        |                         |
|----------|-------------------------------------------------------|------------------------|-------------------------|---------------------------------------------------------------------------|------------------------|-------------------------|
|          | Mean Difference<br>(Standard Error)                   | p-value                | 95% Confidence Interval | Mean Difference<br>(Standard Error)                                       | p-value                | 95% Confidence Interval |
| White    | -0.751(0.093)                                         | 2.59x10 <sup>-15</sup> | -0.93, -0.57            | -0.03 (0.128)                                                             | 0.8                    | -0.28, 0.22             |
| Black    | -1.156 (0.129)                                        | 1.65x10 <sup>-18</sup> | -1.4, -0.90             | -1.4 (0.179)                                                              | 1.05x10 <sup>-14</sup> | -1.8, -1.1              |
| Hispanic | -0.556 (0.160)                                        | 0.0005                 | -0.87, -0.24            | -0.78 (0.215)                                                             | 0.0003                 | -1.2, -0.36             |
| Asian    | -1.583 (0.265)                                        | 3.18x10 <sup>-9</sup>  | -2.1, -1.1              | -2.1 (0.360)                                                              | 5.77x10 <sup>-9</sup>  | -2.8, -1.4              |

**eTable 3:** Adjusted fully specified linear mixed-effects model including interactions between race and each covariate as fixed effects

|                           | Estimate | Std. Error | t value | Pr(> t ) |
|---------------------------|----------|------------|---------|----------|
| (Intercept)               | -0.135   | 1.365      | -0.099  | 0.921    |
| <b>Race:</b>              |          |            |         |          |
| Asian                     | -3.170   | 3.778      | -0.839  | 0.402    |
| Black                     | 0.395    | 1.828      | 0.216   | 0.829    |
| Hispanic                  | -4.195   | 2.046      | -2.051  | 0.041    |
| SpO2                      | -1.777   | 0.122      | -14.620 | 0.000    |
| <b>Race : SpO2</b>        |          |            |         |          |
| Asian : SpO2              | 1.543    | 0.334      | 4.622   | 0.000    |
| Black : SpO2              | 0.403    | 0.166      | 2.427   | 0.016    |
| Hispanic : SpO2           | 0.585    | 0.200      | 2.921   | 0.004    |
| MAP                       | -0.080   | 0.062      | -1.282  | 0.201    |
| Temperature               | -0.036   | 0.065      | -0.559  | 0.577    |
| Age                       | -0.032   | 0.024      | -1.350  | 0.178    |
| Age ≥ 65                  | 0.202    | 0.696      | 0.290   | 0.772    |
| Male                      | 0.136    | 0.444      | 0.306   | 0.760    |
| <b>O2 device:</b>         |          |            |         |          |
| WHO = 5                   | 0.359    | 0.484      | 0.742   | 0.458    |
| WHO = 6 or 7              | 0.717    | 0.383      | 1.870   | 0.061    |
| HGB                       | -0.068   | 0.106      | -0.643  | 0.521    |
| Creatinine                | 0.216    | 0.168      | 1.285   | 0.200    |
| Bilirubin                 | -0.837   | 0.768      | -1.089  | 0.277    |
| Diabetes                  | 0.425    | 0.475      | 0.894   | 0.372    |
| CCI 1-4                   | 0.055    | 0.753      | 0.072   | 0.942    |
| CCI ≥5                    | 0.511    | 0.936      | 0.546   | 0.585    |
| <b>Race : MAP</b>         |          |            |         |          |
| Asian : MAP               | -0.040   | 0.162      | -0.245  | 0.807    |
| Black : MAP               | 0.043    | 0.082      | 0.522   | 0.602    |
| Hispanic : MAP            | -0.143   | 0.098      | -1.452  | 0.147    |
| <b>Race : Temperature</b> |          |            |         |          |
| Asian : Temperature       | -0.022   | 0.173      | -0.128  | 0.898    |
| Black : Temperature       | 0.000    | 0.088      | 0.004   | 0.997    |
| Hispanic : Temperature    | 0.048    | 0.103      | 0.463   | 0.643    |
| <b>Race : Age</b>         |          |            |         |          |
| Asian : Age               | 0.078    | 0.059      | 1.326   | 0.186    |
| Black : Age               | -0.025   | 0.032      | -0.776  | 0.438    |
| Hispanic : Age            | 0.026    | 0.036      | 0.724   | 0.469    |
| <b>Race : Age ≥ 65</b>    |          |            |         |          |
| Asian : Age ≥ 65          | -2.180   | 1.690      | -1.290  | 0.198    |

|                          | <b>Estimate</b> | <b>Std. Error</b> | <b>t value</b> | <b>Pr(&gt; t )</b> |
|--------------------------|-----------------|-------------------|----------------|--------------------|
| Black : Age ≥ 65         | 0.765           | 0.953             | 0.803          | 0.422              |
| Hispanic : Age ≥ 65      | 0.442           | 1.148             | 0.385          | 0.700              |
| <b>Race : Male</b>       |                 |                   |                |                    |
| Asian : Male             | -0.019          | 1.280             | -0.015         | 0.988              |
| Black : Male             | 0.189           | 0.602             | 0.315          | 0.753              |
| Hispanic : Male          | 0.021           | 0.819             | 0.026          | 0.979              |
| <b>Race : O2 device</b>  |                 |                   |                |                    |
| Asian : WHO = 5          | -2.337          | 1.585             | -1.475         | 0.140              |
| Black : WHO = 5          | -0.252          | 0.662             | -0.380         | 0.704              |
| Hispanic : WHO = 5       | 2.088           | 0.807             | 2.588          | 0.010              |
| Asian : WHO = 6 or 7     | -1.447          | 1.286             | -1.125         | 0.260              |
| Black : WHO = 6 or 7     | 0.274           | 0.523             | 0.523          | 0.601              |
| Hispanic : WHO = 6 or 7  | 1.421           | 0.637             | 2.231          | 0.026              |
| <b>Race : HGB</b>        |                 |                   |                |                    |
| Asian : HGB              | 0.066           | 0.276             | 0.240          | 0.810              |
| Black : HGB              | 0.365           | 0.145             | 2.522          | 0.012              |
| Hispanic : HGB           | 0.237           | 0.166             | 1.433          | 0.153              |
| <b>Race : Creatinine</b> |                 |                   |                |                    |
| Asian : Creatinine       | -0.754          | 0.437             | -1.724         | 0.086              |
| Black : Creatinine       | -0.168          | 0.215             | -0.783         | 0.434              |
| Hispanic : Creatinine    | 0.073           | 0.286             | 0.253          | 0.800              |
| <b>Race : Bilirubin</b>  |                 |                   |                |                    |
| Asian : Bilirubin        | -1.260          | 2.019             | -0.624         | 0.533              |
| Black : Bilirubin        | 1.763           | 1.046             | 1.686          | 0.093              |
| Hispanic : Bilirubin     | -0.657          | 1.208             | -0.544         | 0.587              |
| <b>Race : Diabetes</b>   |                 |                   |                |                    |
| Asian : Diabetes         | -2.689          | 1.463             | -1.839         | 0.067              |
| Black : Diabetes         | -1.106          | 0.661             | -1.674         | 0.095              |
| Hispanic : Diabetes      | -1.125          | 0.843             | -1.335         | 0.183              |
| <b>Race : CCI</b>        |                 |                   |                |                    |
| Asian : CCI 1-4          | 0.483           | 1.761             | 0.274          | 0.784              |
| Black : CCI 1-4          | 0.020           | 1.043             | 0.019          | 0.985              |
| Hispanic : CCI 1-4       | 0.838           | 1.085             | 0.772          | 0.440              |
| Asian : CCI ≥ 5          | -1.768          | 2.559             | -0.691         | 0.490              |
| Black : CCI ≥ 5          | -0.329          | 1.282             | -0.256         | 0.798              |
| Hispanic : CCI ≥ 5       | -0.421          | 1.998             | -0.211         | 0.833              |



**eFigure 1:** Average relative marginal effects by race from the adjusted fully specified linear mixed-effects model

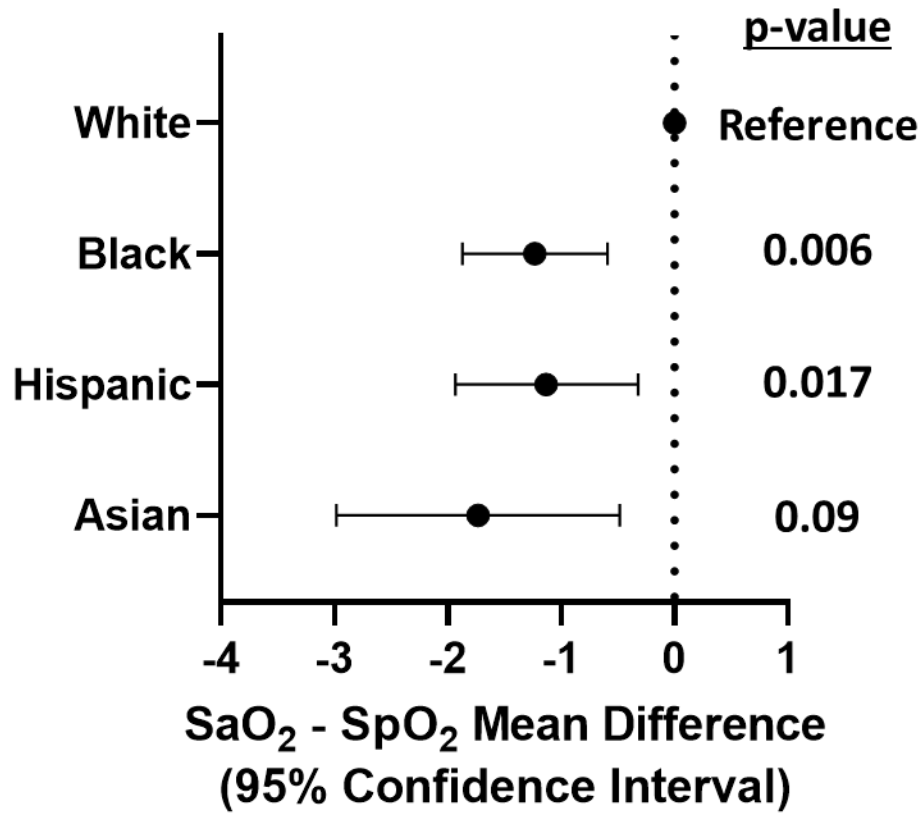

**eTable 4:** Adjusted parsimonious linear mixed-effects model including significant interactions of race with SpO<sub>2</sub> and oxygen device as fixed effects

|                                       | Estimate | Std. Error | t value | Pr(> t ) |
|---------------------------------------|----------|------------|---------|----------|
| (Intercept)                           | 0.340    | 0.888      | 0.383   | 0.702    |
| <b>Race:</b>                          |          |            |         |          |
| Asian                                 | 0.618    | 1.258      | 0.491   | 0.624    |
| Black                                 | -1.473   | 0.544      | -2.708  | 0.007    |
| Hispanic                              | -2.369   | 0.681      | -3.479  | 0.001    |
| SpO <sub>2</sub>                      | -1.779   | 0.124      | -14.346 | 0.000    |
| <b>Race : SpO<sub>2</sub></b>         |          |            |         |          |
| Asian : SpO <sub>2</sub>              | 1.398    | 0.338      | 4.141   | 0.000    |
| Black : SpO <sub>2</sub>              | 0.333    | 0.169      | 1.974   | 0.049    |
| Hispanic : SpO <sub>2</sub>           | 0.567    | 0.204      | 2.779   | 0.006    |
| MAP                                   | -0.092   | 0.034      | -2.672  | 0.008    |
| Temperature                           | -0.028   | 0.037      | -0.758  | 0.449    |
| Age                                   | -0.038   | 0.014      | -2.711  | 0.007    |
| Age ≥ 65                              | 0.342    | 0.433      | 0.790   | 0.430    |
| Male                                  | 0.208    | 0.284      | 0.730   | 0.466    |
| <b>O<sub>2</sub> device:</b>          |          |            |         |          |
| Non-invasive ventilation or high-flow | 0.284    | 0.465      | 0.610   | 0.542    |
| Intubation and Mechanical Ventilation | 0.722    | 0.358      | 2.015   | 0.044    |
| HGB                                   | 0.126    | 0.064      | 1.980   | 0.048    |
| Creatinine                            | 0.081    | 0.111      | 0.735   | 0.463    |
| Bilirubin                             | -0.352   | 0.462      | -0.762  | 0.447    |
| Diabetes                              | -0.238   | 0.311      | -0.764  | 0.445    |
| CCI 1-4                               | 0.102    | 0.440      | 0.233   | 0.816    |
| CCI ≥5                                | 0.439    | 0.584      | 0.751   | 0.453    |
| <b>Race : O<sub>2</sub> device</b>    |          |            |         |          |
| Asian : Non-invasive and HFNC         | -2.616   | 1.437      | -1.821  | 0.069    |
| Black : Non-invasive and HFNC         | -0.028   | 0.633      | -0.044  | 0.965    |
| Hispanic : Non-invasive and HFNC      | 1.754    | 0.770      | 2.277   | 0.023    |
| Asian : Ventilator                    | -2.358   | 1.148      | -2.054  | 0.040    |
| Black : Ventilator                    | 0.260    | 0.490      | 0.530   | 0.596    |
| Hispanic : Ventilator                 | 1.257    | 0.595      | 2.110   | 0.035    |

**eFigure 2:** Average absolute differences between SaO<sub>2</sub> and SpO<sub>2</sub> by race stratified by oxygen device

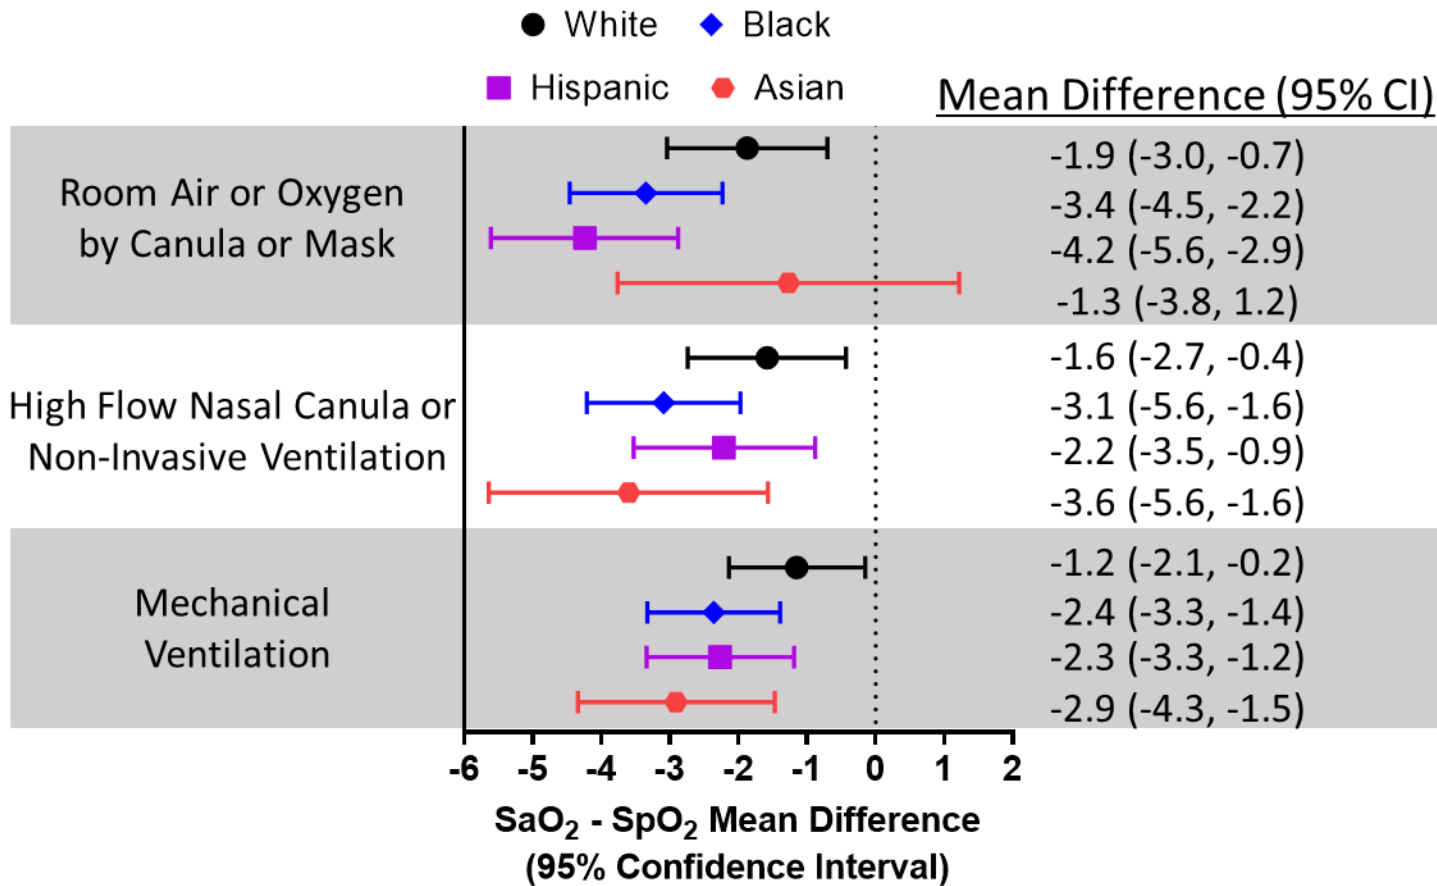

**eTable 5:** Baseline characteristics of patients testing positive for COVID-19 with predicted SaO<sub>2</sub>≤94% before SpO<sub>2</sub>≤94% or oxygen initiation included in the analysis of unrecognized or delayed treatment eligibility

| <b>Characteristic [mean ± SD or N (%) unless otherwise specified]</b> | <b>White, non-Hispanic (N = 505)</b> | <b>Black (N = 928)</b> | <b>Hispanic (excluding Black Hispanic) (N = 445)</b> | <b>Asian (N = 25)</b> |
|-----------------------------------------------------------------------|--------------------------------------|------------------------|------------------------------------------------------|-----------------------|
| Age (years)                                                           | 74.9 ±13.3                           | 59.5 ±17.1             | 48.4 ±16.9                                           | 78.1 ±12.3            |
| Female                                                                | 246 (48.7%)                          | 510 (55%)              | 200 (44.9%)                                          | 16 (64%)              |
| Location                                                              |                                      |                        |                                                      |                       |
| Johns Hopkins Hospital                                                | 92 (18.2%)                           | 449 (48.4%)            | 143 (32.1%)                                          | 3 (12%)               |
| Bayview Medical Center                                                | 125 (24.8%)                          | 141 (15.2%)            | 101 (22.7%)                                          | 3 (12%)               |
| Howard County General Hospital                                        | 113 (22.4%)                          | 173 (18.6%)            | 77 (17.3%)                                           | 11 (44%)              |
| Sibley Memorial Hospital                                              | 54 (10.7%)                           | 86 (9.3%)              | 18 (4%)                                              | 0 (0%)                |
| Suburban Hospital                                                     | 121 (24%)                            | 75 (8.1%)              | 102 (22.9%)                                          | 8 (32%)               |
| Hemoglobin on admission (g/dL)                                        | 12.7 ±2.1                            | 12.3 ±2.2              | 13.2 ±2.2                                            | 12.2 ±2.4             |
| Bilirubin on admission (mg/dL)                                        | 0.7 ±1.7                             | 0.6 ±0.9               | 0.6 ±1.2                                             | 0.5 ±0.4              |
| Creatinine on admission (mg/dL)                                       | 1.3 ±0.9                             | 1.8 ±2.2               | 1.1 ±1.5                                             | 1.6 ±1.3              |
| Body Mass Index                                                       | 27.0 ±5.6                            | 31 ±8.6                | 29.4 ±6.3                                            | 23.5 ±3.2             |
| Charleston Comorbidity Index                                          |                                      |                        |                                                      |                       |
| Charleston Comorbidity Index 1-4                                      | 373 (73.9%)                          | 611 (65.8%)            | 221 (49.7%)                                          | 14 (56%)              |
| Charleston Comorbidity Index ≥ 5                                      | 51 (10.1%)                           | 142 (15.3%)            | 13 (2.9%)                                            | 3 (12%)               |
| Diabetes                                                              | 180 (35.6%)                          | 417 (44.9%)            | 129 (29%)                                            | 13 (52%)              |
| Chronic Obstructive Pulmonary Disease                                 | 136 (26.9%)                          | 291 (31.4%)            | 68 (15.3%)                                           | 4 (16%)               |
| Peripheral Vascular Disease                                           | 86 (17%)                             | 153 (16.5%)            | 20 (4.5%)                                            | 1 (4%)                |
| Chronic Kidney Disease                                                | 144 (28.5%)                          | 304 (32.8%)            | 46 (10.3%)                                           | 7 (28%)               |
| Maximum Respiratory Support Needed                                    |                                      |                        |                                                      |                       |
| Room air or oxygen by mask or nasal prongs                            | 482 (95.4%)                          | 882 (95.0%)            | 426 (95.7%)                                          | 23 (92.0%)            |
| Non-invasive ventilation or high-flow oxygen                          | 4 (0.8%)                             | 8 (0.9%)               | 2 (0.4%)                                             | 0 (0%)                |
| Mechanical Ventilation                                                | 19 (3.8%)                            | 38 (4.1%)              | 17 (3.9%)                                            | 2 (8.0%)              |

**eFigure 3:** Proportion of patients with pulse oximetry ( $SpO_2$ )  $\leq 94\%$  or initiated oxygen since predicted arterial oxygen saturation ( $SaO_2$ )  $\leq 94\%$  among patients diagnosed with COVID-19 among patients ultimately having  $SpO_2 \leq 94\%$  or initiated oxygen

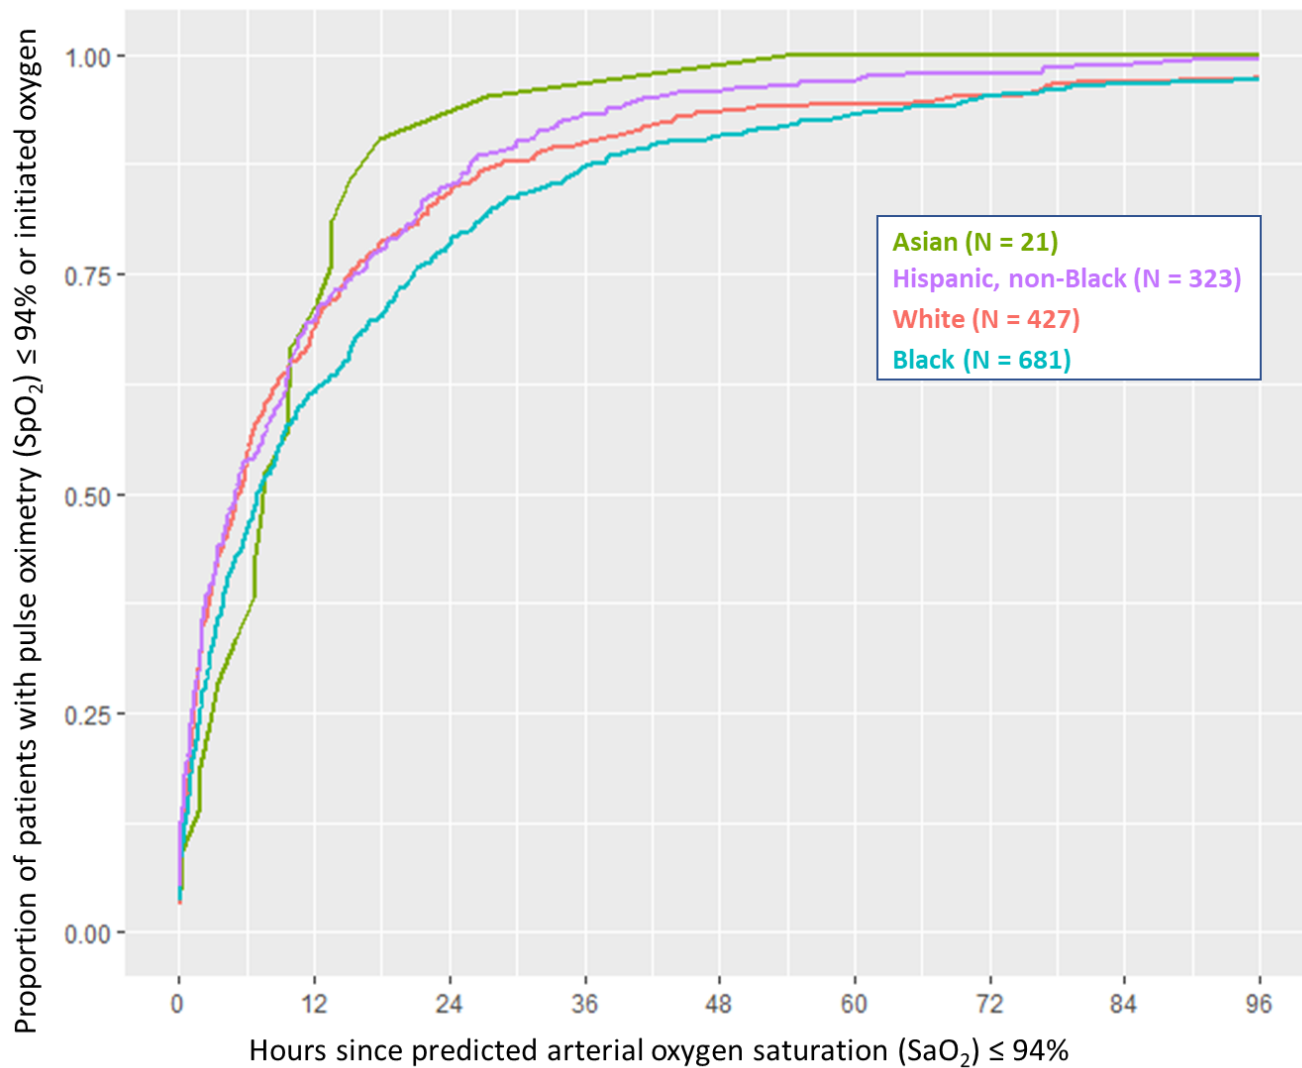

**eTable 6:** Absolute and relative treatment eligibility delay by race among 1,452 patients with predicted SaO<sub>2</sub>≤94% before SpO<sub>2</sub>≤94% or oxygen initiation

| <b>Race</b>                                              | <b>White</b>           | <b>Black</b>           | <b>Hispanic</b>           | <b>Asian</b>           |
|----------------------------------------------------------|------------------------|------------------------|---------------------------|------------------------|
| <b>N</b>                                                 | 427                    | 681                    | 323                       | 21                     |
| <b>Mean (SD) Absolute Treatment Eligibility Delay</b>    | 14.8 (28.9) hours      | 18.6 (35.7) hours      | 15.4 (74.8) hours         | 10.8 (11.9) hours      |
| <b>Median (IQR) Absolute Treatment Eligibility Delay</b> | 5.3 (1.4 - 15.2) hours | 7.0 (1.9 - 20.8) hours | 5.0 (1.2 - 15.8) hours    | 7.7 (3.5 - 13.6) hours |
| <b>Difference in Location* (95% Confidence Interval)</b> | Reference              | 1.0 (0.23, 1.9) hours  | -0.14 (-0.87, 0.48) hours | 1.4 (-1.7, 4.8) hours  |
| <b>p-value**</b>                                         | Reference              | 0.006                  | 0.3                       | 0.6                    |

\*Median of the difference between samples \*\*Wilcoxon Rank-Sum Test
